# Supplementary material for: NAFLD in Polycystic Ovary Syndrome: Association with PNPLA3 and Metabolic Features
Source: MDPI journal article supplement (doi:10.3390/biomedicines10112719), 2022-10-27
Supplement: s1 [file s1]

**Supplementary Table S1** - Clinical and biochemical characteristics of patients according to PNPLA3 gene polymorphism.

|                              | PNPLA3                             |                                   | p value    |
|------------------------------|------------------------------------|-----------------------------------|------------|
|                              | CC (n = 82)<br>%(n) or Mean±SD     | CG/GG (n = 81)<br>%(n) or Mean±SD |            |
| Age, y                       | 31.0 ± 8.0                         | 34.0 ± 8.0                        | 0.044      |
| NAFLD                        | 67.1% (55)                         | 77.8% (63)                        | 0.161      |
| CAP, dB/ m*                  |                                    |                                   | 0.176      |
|                              | < 231                              | 3.6% (2)                          | 9.5% (6)   |
|                              | 231-267                            | 21.8% (12)                        | 22.2% (14) |
|                              | 268-300                            | 27.3% (15)                        | 12.7% (8)  |
|                              | > 300                              | 47.3% (26)                        | 55.6% (35) |
| LSM, kPa*                    |                                    |                                   | 0.684      |
|                              | < 5.8                              | 56.4% (31)                        | 52.4% (33) |
|                              | 5.8-6.9                            | 23.6% (13)                        | 20.6% (13) |
|                              | 7.0-8.6                            | 12.7% (7)                         | 11.1% (7)  |
|                              | 8.7-11.4                           | 7.4% (4)                          | 12.7% (8)  |
|                              | > 11.4                             | -                                 | 3.2% (2)   |
| AST, U/L                     | 18.0 ± 5.0                         | 22.0 ± 11.0                       | 0.056      |
| ALT, U/L                     | 21.0 ± 10.0                        | 28.0 ± 20.0                       | 0.052      |
| GGT, U/L                     | 29.0 ± 21.0                        | 31.0 ± 23.0                       | 0.371      |
| Alkaline phosphatase, U/L    | 71.0 ± 20.0                        | 73.0 ± 24.0                       | 0.947      |
| Ferritin, ng/mL              | 110.1 ± 106.9                      | 114.9 ± 100.6                     | 0.492      |
| PCOS phenotype               |                                    |                                   | 0.843      |
|                              | A                                  | 76.5% (62)                        | 70.9% (56) |
|                              | B                                  | 14.8% (12)                        | 19.0% (15) |
|                              | C                                  | 4.9% (4)                          | 5.1% (4)   |
|                              | D                                  | 3.7% (3)                          | 5.1% (4)   |
| Total testosterone, ng/dL    | 63.0 ± 33.1                        | 55.0 ± 40.7                       | 0.021      |
| Free testosterone, ng/dL     | 40.0 ± 25.0                        | 32.0 ± 22.0                       | 0.032      |
| Androstenedione, ng/dL       | 2.7 ± 6.3                          | 2.0 ± 1.6                         | 0.619      |
| DHEA-S, ng/mL                | 2189.0 ± 1305.0                    | 2067.0 ± 1453.0                   | 0.386      |
| Glycemic profile             |                                    |                                   | 0.102      |
|                              | Normal                             | 19.5% (16)                        | 20.0% (16) |
|                              | IR without diabetes or prediabetes | 58.5% (48)                        | 41.3% (33) |
|                              | Prediabetes                        | 9.8% (8)                          | 16.3% (13) |
|                              | Diabetes                           | 12.2% (10)                        | 22.5% (18) |
| Fasting insulin, µU/mL       | 25.3 ± 20.0                        | 29.1 ± 28.4                       | 0.686      |
| Fasting glucose, mg/dL       | 91.0 ± 16.0                        | 97.0 ± 46.0                       | 0.596      |
| HOMA-IR ≥ 2.5                | 77.8% (63)                         | 72.2% (57)                        | 0.467      |
| Metabolic syndrome           | 43.2% (35)                         | 42.0% (34)                        | 1.000      |
| SAH                          | 14.6% (12)                         | 22.2% (18)                        | 0.231      |
| HDL, mg/dL                   | 47.0 ± 13.0                        | 50.0 ± 12.0                       | 0.167      |
| Triglycerides, mg/dL         | 162.0 ± 114.0                      | 140.0 ± 76.0                      | 0.530      |
| Weight classification by BMI |                                    |                                   | 0.997      |
|                              | Normal                             | 12.2% (10)                        | 12.3% (10) |
|                              | Overweight                         | 22.0% (18)                        | 23.5% (19) |
|                              | Obesity class I                    | 26.8% (22)                        | 25.9% (21) |
|                              | Obesity class II                   | 24.4% (20)                        | 25.9% (21) |
|                              | Obesity class III                  | 14.6% (12)                        | 12.3% (10) |

\*Transient hepatic elastography was not performed in 45 patients due to the absence of hepatic steatosis on ultrasound.

SD: standard deviation; NAFLD: nonalcoholic fatty liver disease; CAP: controlled attenuation parameter; LSM: liver stiffness measurement; AST: aspartate aminotransferase; ALT: alanine aminotransferase; GGT: gamma glutamyl transferase; PCOS: polycystic ovary syndrome; DHEA-S: dehydroepiandrosterone sulfate; IR: insulin resistance; HOMA-IR: *Homeostasis Model*

*Assessment of Insulin Resistance*; SAH. systemic arterial hypertension; HDL: high-density lipoprotein; BMI: body mass index

**Supplementary Table S2** - Clinical and biochemical characteristics of patients according to the presence of NAFLD

|                                    | No NAFLD (n = 45)<br>%(n) or Mean±SD | NAFLD (n = 118)<br>%(n) or Mean±SD | p value  |
|------------------------------------|--------------------------------------|------------------------------------|----------|
| Age, y                             | 29.0 ± 8.0                           | 34.0 ± 8.0                         | 0.002*   |
| PNPLA3 polymorphism                |                                      |                                    |          |
| CC                                 | 60.0% (27)                           | 46.6% (55)                         | 0.315    |
| CG                                 | 35.6% (16)                           | 44.1% (52)                         |          |
| GG                                 | 4.4% (2)                             | 9.3% (11)                          |          |
| AST, U/L                           | 17.0 ± 4.0                           | 21.0 ± 10.0                        | 0.026*   |
| ALT, U/L                           | 17.0 ± 7.0                           | 27.0 ± 18.0                        | < 0.001* |
| GGT, U/L                           | 21.0 ± 17.0                          | 33.0 ± 22.0                        | < 0.001* |
| Ferritin, ng/mL                    | 82.0 ± 90.6                          | 123.6 ± 105.9                      | 0.009*   |
| PCOM                               | 93.2% (41)                           | 78.3% (90)                         | 0.035*   |
| HA                                 | 93.3% (42)                           | 96.6% (114)                        | 0.396    |
| Irregular menstrual cycles         | 97.8% (44)                           | 94.9% (112)                        | 0.675    |
| PCOS phenotype                     |                                      |                                    |          |
| A                                  | 84.1% (37)                           | 69.8% (81)                         | 0.079    |
| B                                  | 6.8% (3)                             | 20.7% (24)                         |          |
| C                                  | 2.3% (1)                             | 6.0% (7)                           |          |
| D                                  | 6.8% (3)                             | 3.4% (4)                           |          |
| Total testosterone, ng/dL          | 56.0 ± 28.3                          | 60.2 ± 40.1                        | 0.755    |
| Free testosterone, ng/dL           | 31.0 ± 24.0                          | 37.0 ± 23.0                        | 0.086    |
| Androstenedione, ng/dL             | 3.2 ± 8.6                            | 2.1 ± 1.5                          | 0.507    |
| DHEA-S, ng/mL                      | 2369.0 ± 1275.0                      | 2039.0 ± 1407.0                    | 0.052    |
| Glycemic profile                   |                                      |                                    | < 0.001* |
| Normal                             | 50.0% (22)                           | 8.5% (10)                          |          |
| IR without diabetes or prediabetes | 43.2% (19)                           | 52.5% (62)                         |          |
| Prediabetes                        | 2.3% (1)                             | 17.0% (20)                         |          |
| Diabetes                           | 4.5% (2)                             | 22.0% (26)                         |          |
| Fasting insulin, µU/mL             | 16.6 ± 13.9                          | 31.0 ± 26.4                        | <0.001*  |
| Fasting glucose, mg/dL             | 85.0 ± 11.0                          | 97.0 ± 40.0                        | 0.009*   |
| HOMA-IR                            | 3.6 ± 3.3                            | 7.7 ± 7.6                          | <0.001*  |
| HOMA-IR ≥ 2.5                      | 41.9% (18)                           | 87.2% (102)                        | <0.001*  |
| Metformin use                      | 13.3% (6)                            | 41.5% (49)                         | 0.001*   |
| Metabolic syndrome                 | 13.3% (6)                            | 53.8% (63)                         | <0.001*  |
| SAH                                | 2.2% (1)                             | 24.6% (29)                         | <0.001*  |
| Total cholesterol, mg/dL           | 173.0 ± 28.0                         | 185.0 ± 38.0                       | 0.049*   |
| LDL, mg/dL                         | 98.0 ± 26.0                          | 111.0 ± 31.0                       | 0.017*   |
| HDL, mg/dL                         | 56.0 ± 12.0                          | 46.0 ± 11.0                        | <0.001*  |
| Triglycerides, mg/dL               | 98.0 ± 52.0                          | 171.0 ± 104.0                      | <0.001*  |
| Smoking status                     |                                      |                                    | 0.567    |
| Current smoker                     | 2.2% (1)                             | 6.8% (8)                           |          |
| Former smoker                      | 4.4% (2)                             | 5.1% (6)                           |          |
| Weight classification by BMI       |                                      |                                    |          |
| Normal                             | 35.6% (16)                           | 3.4% (4)                           | <0.001*  |
| Overweight                         | 26.7% (12)                           | 21.2% (25)                         |          |
| Obesity class I                    | 15.6% (7)                            | 30.5% (36)                         |          |
| Obesity class II                   | 15.6% (7)                            | 28.8% (34)                         |          |
| Obesity class III                  | 6.7% (3)                             | 16.1% (19)                         |          |
| Waist circumference, cm            | 87.8 ± 16.9                          | 104.3 ± 14.8                       | <0.001*  |
| WHR                                | 0.8 ± 0.1                            | 0.9 ± 0.1                          | <0.001*  |

\*p value < 0.05

NAFLD: nonalcoholic fatty liver disease; SD: standard deviation; AST: aspartate aminotransferase; ALT: alanine aminotransferase; GGT: gamma glutamyl transferase; PCOM: polycystic ovary morphology; HA: hyperandrogenism and/or hyperandrogenemia; PCOS:

polycystic ovary syndrome; DHEA-S: dehydroepiandrosterone sulfate; IR: insulin resistance; HOMA-IR. *Homeostasis Model Assessment of Insulin Resistance*; SAH: systemic arterial hypertension; LDL: low-density lipoprotein; HDL: high-density lipoprotein; BMI: body mass index; WHR: waist-hip ratio

**Supplementary Table S3** - Characteristics of NAFLD patients according to the presence of advanced fibrosis on TE

|                                 |                                    | Fibrosis (TE)                     |                                   | p value |
|---------------------------------|------------------------------------|-----------------------------------|-----------------------------------|---------|
|                                 |                                    | ≤ F2 (n = 104)<br>%(n) or Mean±SD | F3/F4 (n = 14)<br>%(n) or Mean±SD |         |
| Age, y                          |                                    | 33.0 ± 8.0                        | 39.0 ± 8.0                        | 0.017*  |
| PNPLA3 polymorphism             |                                    |                                   |                                   | 0.099   |
|                                 | CC                                 | 49.0% (51)                        | 28.6% (4)                         |         |
|                                 | CG                                 | 40.4% (42)                        | 71.4% (10)                        |         |
|                                 | GG                                 | 10.6% (11)                        | -                                 |         |
| CAP, dB/ m                      |                                    |                                   |                                   | 0.939   |
|                                 | < 231                              | 6.7% (7)                          | 7.1% (1)                          |         |
|                                 | 231-267                            | 23.1% (24)                        | 14.3% (2)                         |         |
|                                 | 268-300                            | 19.2% (20)                        | 21.4% (3)                         |         |
|                                 | > 300                              | 51.0% (53)                        | 57.1% (8)                         |         |
| NAFLD-FS                        |                                    | 0.5 ± 0.2                         | 0.7 ± 0.3                         | 0.031*  |
| FIB-4                           |                                    | 0.4 ± 0.2                         | 0.5 ± 0.1                         | 0.154   |
| Total bilirubin, mg/dL          |                                    | 0.4 ± 0.2                         | 0.5 ± 0.1                         | 0.154   |
| AST, U/L                        |                                    | 20.0 ± 9.0                        | 30.0 ± 14.0                       | 0.005*  |
| ALT, U/L                        |                                    | 26.0 ± 16.0                       | 39.0 ± 23.0                       | 0.028*  |
| GGT, U/L                        |                                    | 34.0 ± 23.0                       | 27.0 ± 13.0                       | 0.386   |
| Alkaline phosphatase, U/L       |                                    | 72.0 ± 22.0                       | 80.0 ± 23.0                       | 0.109   |
| Platelets, x 10 <sup>9</sup> /L |                                    | 290.0 ± 56.0                      | 298.0 ± 82.0                      | 0.947   |
| Ferritin, ng/mL                 |                                    | 124.0 ± 107.3                     | 120.4 ± 97.5                      | 0.951   |
| HA                              |                                    | 97.1% (101)                       | 92.9% (13)                        | 0.401   |
| PCOS phenotype                  |                                    |                                   |                                   | 0.493   |
|                                 | A                                  | 70.9% (73)                        | 61.5% (8)                         |         |
|                                 | B                                  | 20.4% (21)                        | 23.1% (3)                         |         |
|                                 | C                                  | 5.8% (6)                          | 7.7% (1)                          |         |
|                                 | D                                  | 2.9% (3)                          | 7.7% (1)                          |         |
| Total testosterone, ng/dL       |                                    | 61.2 ± 40.8                       | 53.4 ± 34.8                       | 0.376   |
| Free testosterone, ng/dL        |                                    | 38.0 ± 24.0                       | 31.0 ± 18.0                       | 0.289   |
| Androstenedione, ng/dL          |                                    | 2.0 ± 1.3                         | 2.5 ± 2.2                         | 0.539   |
| DHEA-S, ng/mL                   |                                    | 2124.0 ± 1438.0                   | 1455.0 ± 1024.0                   | 0.050   |
| Glycemic profile                |                                    |                                   |                                   | 0.414   |
|                                 | Normal                             | 8.7% (9)                          | 7.1% (1)                          |         |
|                                 | IR without diabetes or prediabetes | 54.8% (57)                        | 35.7% (5)                         |         |
|                                 | Prediabetes                        | 15.4% (16)                        | 28.6% (4)                         |         |
|                                 | Diabetes                           | 21.2% (22)                        | 28.6% (4)                         |         |
| Fasting insulin, µU/mL          |                                    | 31.2 ± 27.6                       | 30.1 ± 14.9                       | 0.460   |
| Fasting glucose, mg/dL          |                                    | 95.0 ± 36.0                       | 115.0 ± 61.0                      | 0.146   |
| HOMA-IR                         |                                    | 7.4 ± 7.5                         | 9.5 ± 8.3                         | 0.279   |
| HOMA-IR ≥ 2.5                   |                                    | 87.4% (90)                        | 85.7% (12)                        | 1.000   |
| Metformin use                   |                                    | 37.5% (39)                        | 71.4% (10)                        | 0.021*  |
| Metabolic syndrome              |                                    | 49.0% (51)                        | 92.3% (12)                        | 0.003*  |
| SAH                             |                                    | 22.1% (23)                        | 42.9% (6)                         | 0.105   |
| Total cholesterol, mg/dL        |                                    | 186.0 ± 38.0                      | 184.0 ± 37.0                      | 0.739   |
| LDL, mg/dL                      |                                    | 110.0 ± 31.0                      | 113.0 ± 32.0                      | 0.874   |
| HDL, mg/dL                      |                                    | 46.0 ± 12.0                       | 43.0 ± 9.0                        | 0.524   |
| Triglycerides, mg/dL            |                                    | 171.0 ± 107.0                     | 173.0 ± 78.0                      | 0.487   |
| Smoking status                  |                                    |                                   |                                   | 0.501   |
|                                 | Current smoker                     | 7.7% (8)                          | 0.0%                              |         |
|                                 | Former smoker                      | 4.8% (5)                          | 7.1% (0.8%-28.8%)                 |         |
| Weight classification by BMI    |                                    |                                   |                                   | 0.912   |
|                                 | Normal                             | 3.8% (4)                          | -                                 |         |
|                                 | Overweight                         | 22.1% (23)                        | 14.3% (2)                         |         |

|                         |              |              |        |
|-------------------------|--------------|--------------|--------|
| Obesity class I         | 30.8% (32)   | 28.6% (4)    |        |
| Obesity class II        | 27.9% (29)   | 35.7% (5)    |        |
| Obesity class III       | 15.4% (16)   | 21.4% (3)    |        |
| Waist circumference, cm | 103.2 ± 14.5 | 112.4 ± 14.8 | 0.032* |
| WHR                     | 0.9 ± 0.1    | 1.0 ± 0.0    | 0.012* |

\*p value < 0.05

NAFLD: nonalcoholic fatty liver disease; TE: transient elastography; SD: standard deviation; CAP: controlled attenuation parameter; NAFLD-FS: NAFLD fibrosis score; FIB-4: fibrosis-4; AST: aspartate aminotransferase; ALT: alanine aminotransferase; GGT: gamma glutamyl transferase; HA: hyperandrogenism and/or hyperandrogenemia; PCOS: polycystic ovary syndrome; DHEA-S: dehydroepiandrosterone sulfate; IR: insulin resistance; HOMA-IR: *Homeostasis Model Assessment of Insulin Resistance*; SAH: systemic arterial hypertension; LDL: low-density lipoprotein; HDL: high-density lipoprotein; BMI: body mass index; WHR: waist-hip ratio
